# Supplementary figures and images for: Parental effects alter the adaptive value of an adult behavioural trait
Source: eLife journal article supplement (doi:10.7554/elife.07340), 2015-09-22

Supplementary Figure 2

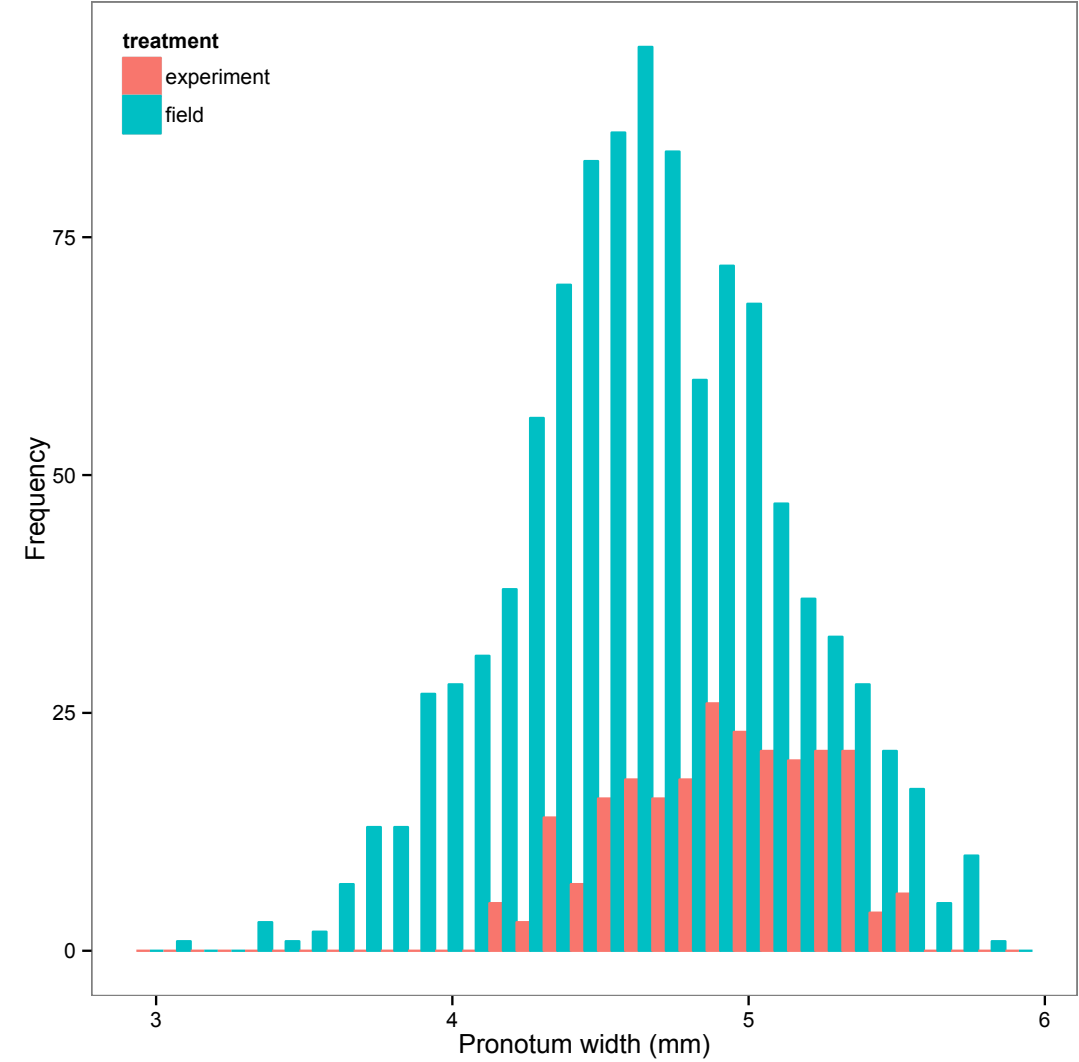

Supplement: supp [file elife-07340-supp-v1.zip]

Supplementary Figure 1

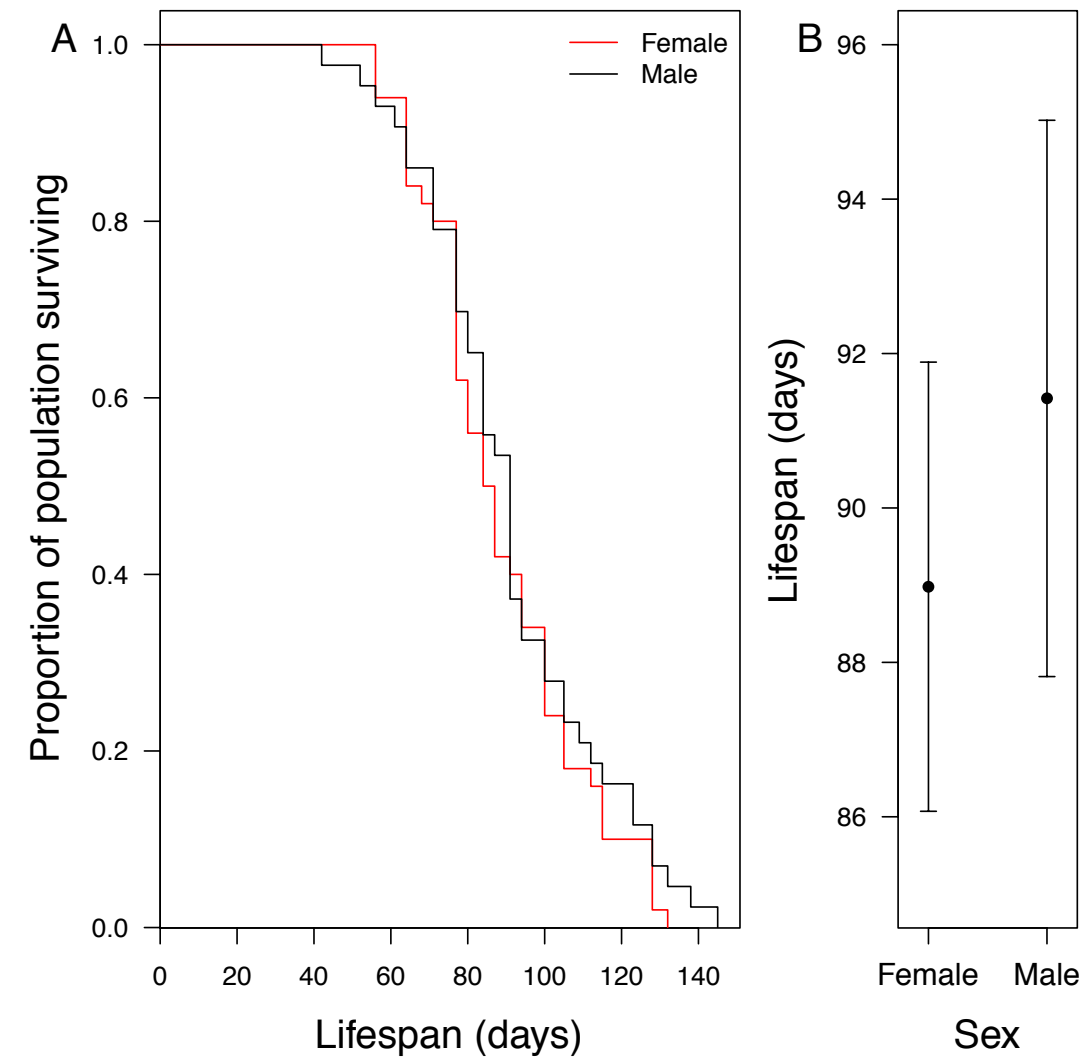

Supplement: supp [file elife-07340-supp-v1.zip]
